# Supplementary material for: Proximate Composition and Spatio-temporal Heterogeneity of Phytochemicals in Agave sisalana (sisal) adapted in different agro-ecological zones of Punjab, Pakistan
Source: Research Square preprint supplement (doi:10.21203/rs.3.rs-181255/v1), 2021-03-29
Supplement: Supplementary file 1 [file 869a9b7284a67a8c8684056e.docx]

×100
